# Supplementary material for: Vitamin D Receptor Gene Polymorphisms Affect Osteoporosis-Related Traits and Response to Antiresorptive Therapy
Source: MDPI journal article supplement (doi:10.3390/genes14010193), 2023-01-11
Supplement: s1 [file s1]

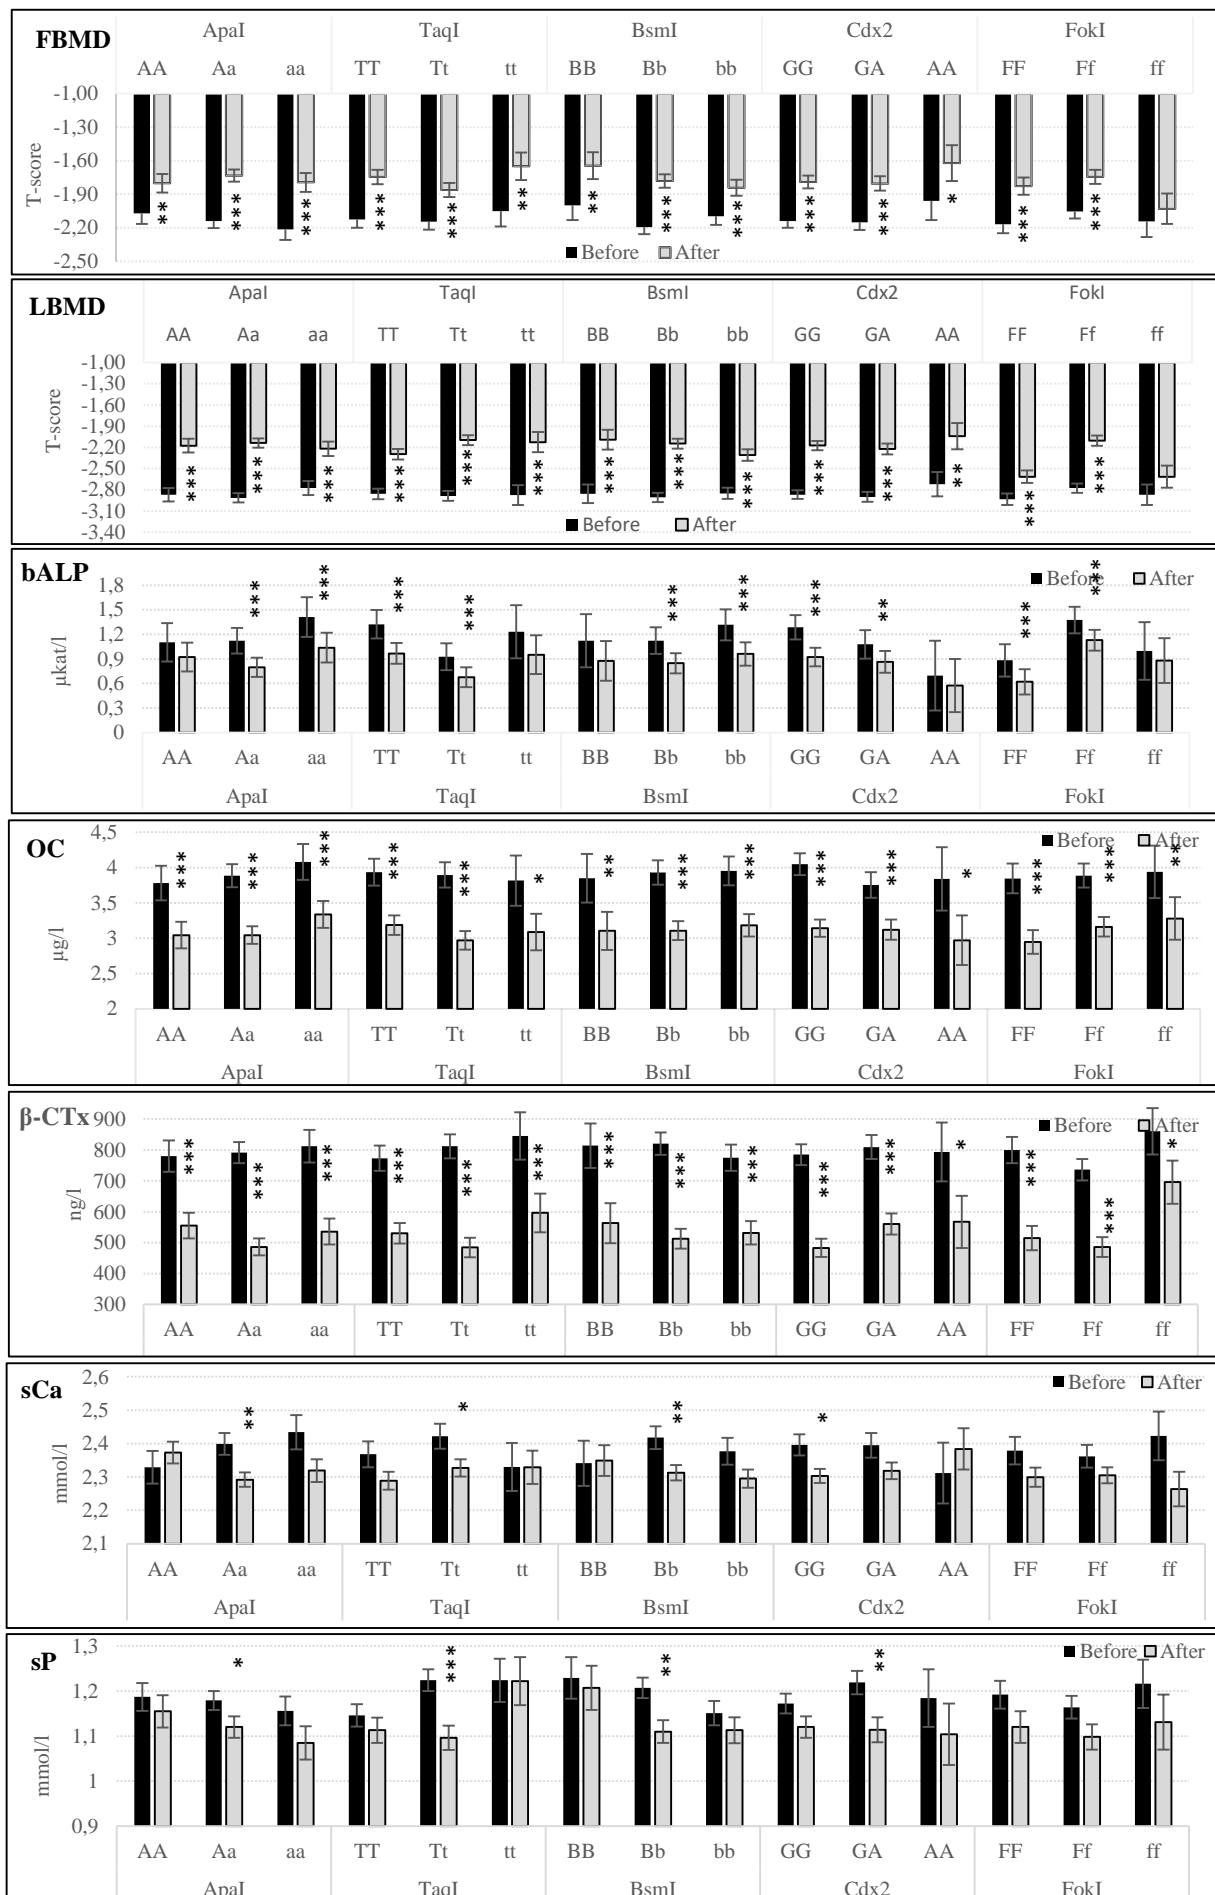

Figure S1: Effects of EPT therapy on osteoporosis-related traits across VDR genotypes. FBMD - femoral neck BMD, LBMD - lumbar spine BMD, bALP - bone isoenzyme of alkaline phosphatase, OC - osteocalcin, β-CTx - BetaCrosslaps, sCa - serum calcium, sP - serum phosphate, P values determine significant difference (\*\*\*P<0.001; \*\*P<0.01, \*P<0.05).

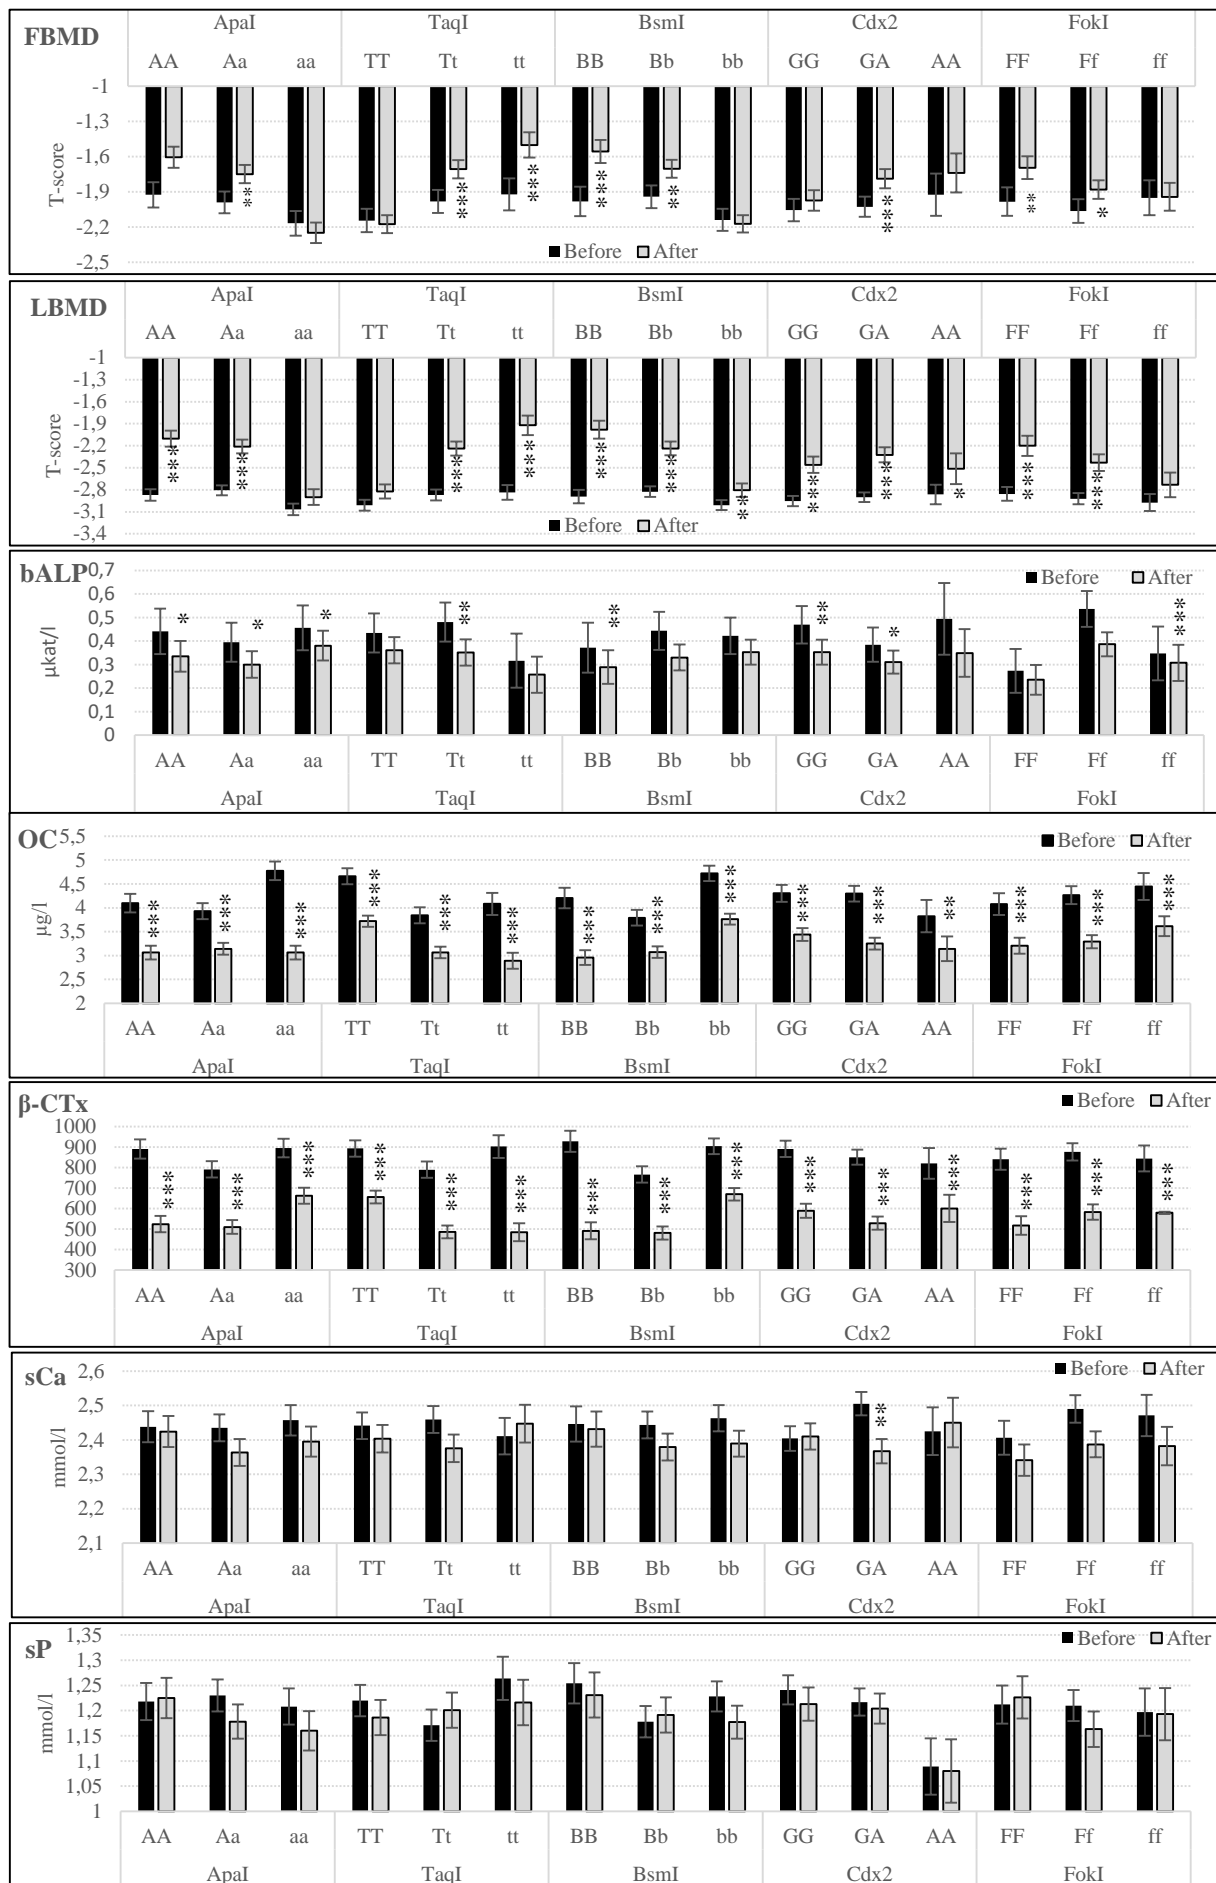

Figure S2: Effects of ibandronate therapy on osteoporosis-related traits across VDR genotypes. FBMD - femoral neck BMD, LBMD - lumbar spine BMD, bALP – bone isoenzyme of alkaline phosphatase, OC – osteocalcin, β-CTX - BetaCrosslaps, sCa - serum calcium, sP - serum phosphate, P values determine significant differences (\*\*\*P<0.001; \*\*P<0.01, \*P<0.05).

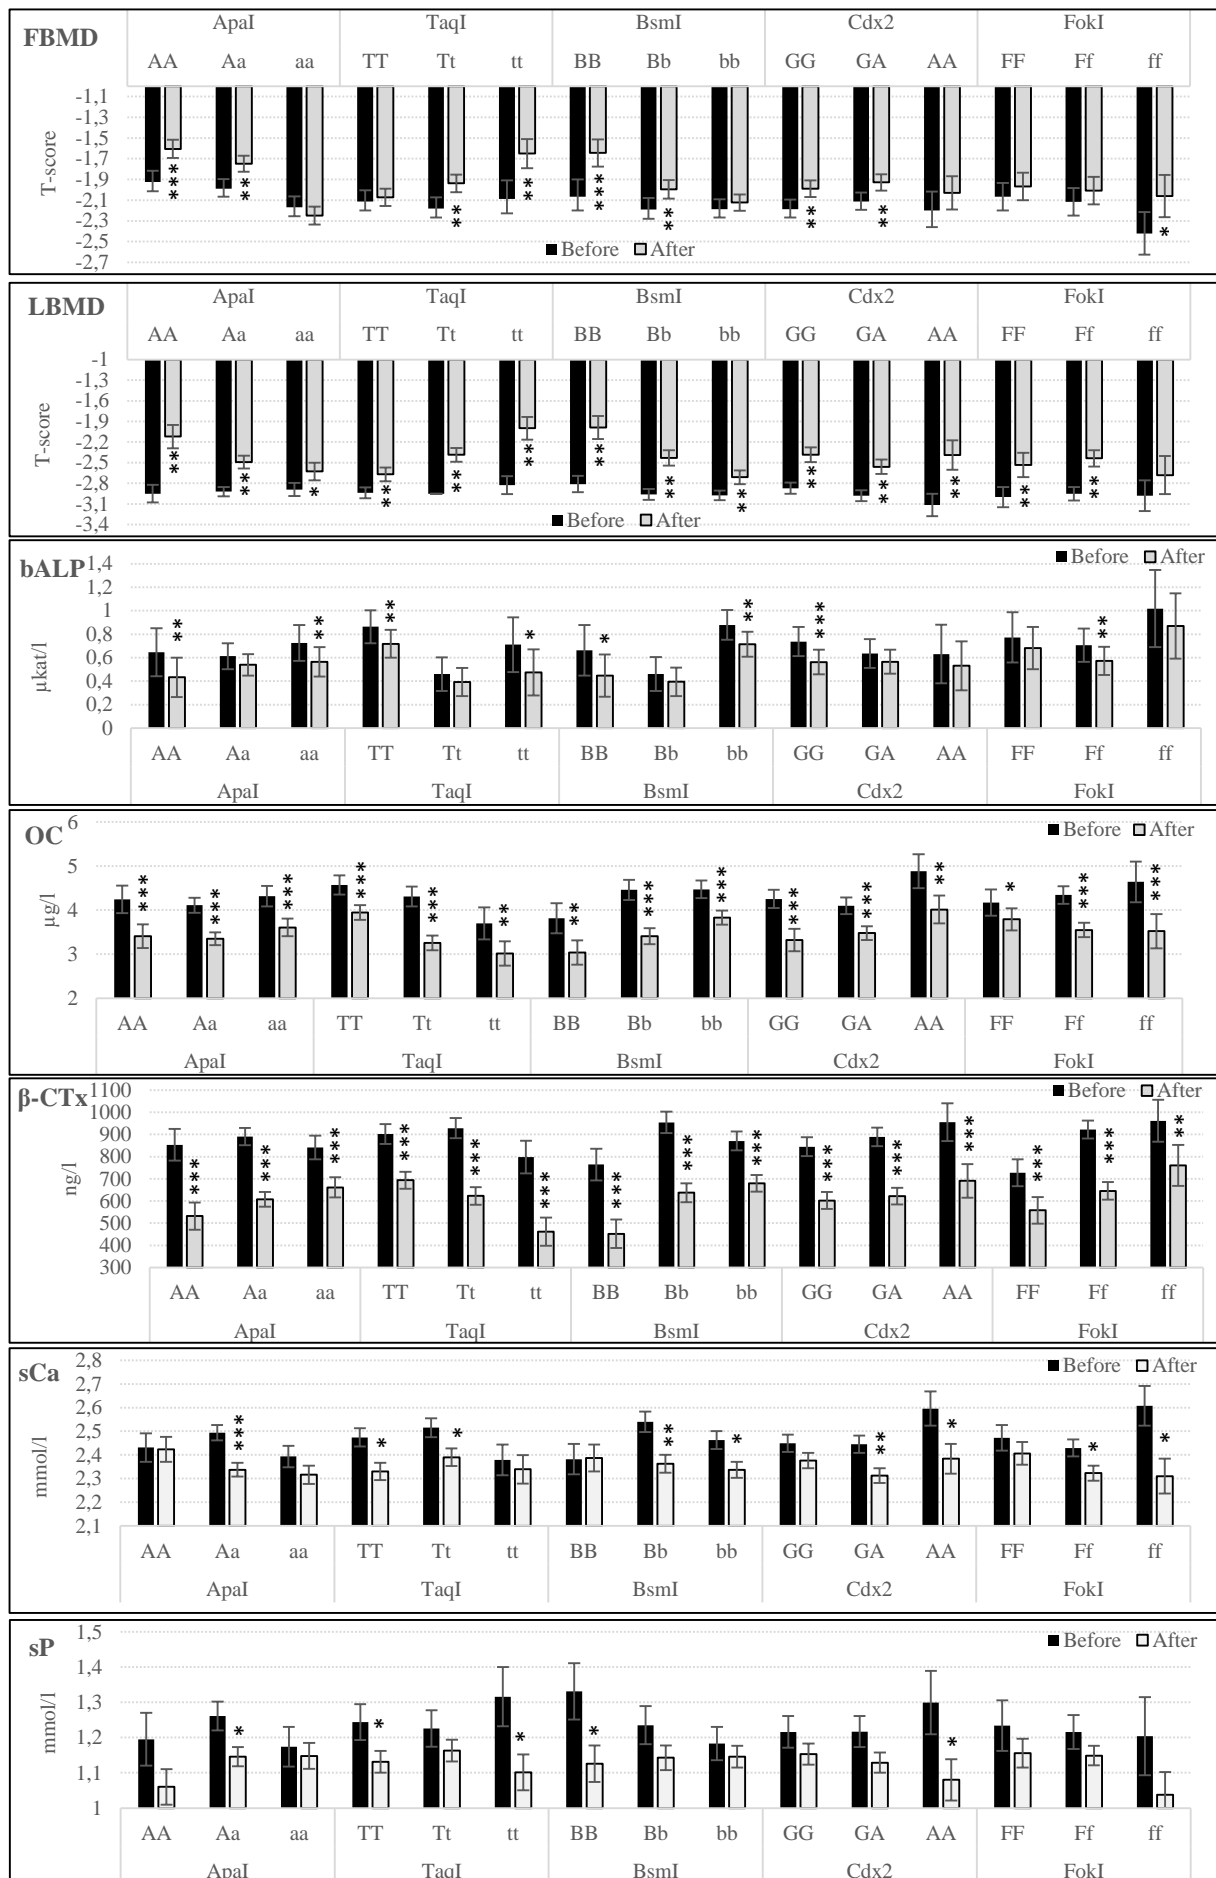

Figure S3: Effects of raloxifene therapy on osteoporosis-related traits across *VDR* genotypes. FBMD - femoral neck BMD, LBMD - lumbar spine BMD, bALP – bone isoenzyme of alkaline phosphatase, OC – osteocalcin, β-CTX - BetaCrosslaps, sCa - serum calcium, sP - serum phosphate, P values determine significant differences (\*\*P<0.001; \*P<0.01, \*P<0.05).
